# Supplementary material for: Development of Surgically Transplantable Parathyroid Hormone-Releasing Microbeads
Source: MDPI journal article supplement (doi:10.3390/biomedicines10020440), 2022-02-14
Supplement: s1 [file s1]

Supplementary Materials:

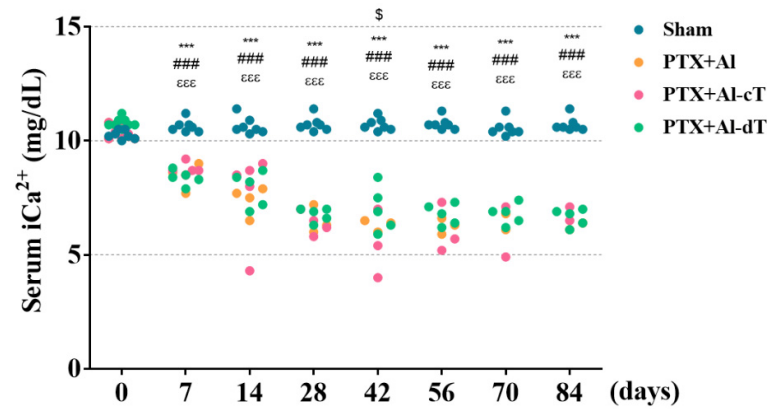

**Figure S1. Assessment of Serum iCa<sup>2+</sup> levels in each experimental animal group.** Statistically significant differences between Sham and PTX+Al is denoted as \*\*\*  $p < 0.001$ ; statistically significant differences between Sham and PTX+Al-cT is denoted as ###  $p < 0.001$ ; statistically significant difference between Sham and PTX+Al-dT is denoted as  $\epsilon\epsilon\epsilon p < 0.001$ ; statistically significant difference between PTX+Al-cT and PTX+Al-dT is denoted as \$  $p < 0.05$ .

**Supplementary Table S1. Number of surviving animals**

| <b>days</b> | <b>Sham</b> | <b>PTX+AI</b> | <b>PTX+AI-cT</b> | <b>PTX+AI-dT</b> |
|-------------|-------------|---------------|------------------|------------------|
| <b>0</b>    | 7           | 6             | 8                | 8                |
| <b>3</b>    | 7           | 4             | 5                | 5                |
| <b>7</b>    | 7           | 4             | 5                | 5                |
| <b>14</b>   | 7           | 4             | 5                | 5                |
| <b>21</b>   | 7           | 3             | 5                | 5                |
| <b>28</b>   | 7           | 3             | 4                | 5                |
| <b>35</b>   | 7           | 3             | 4                | 5                |
| <b>42</b>   | 7           | 3             | 3                | 5                |
| <b>56</b>   | 7           | 3             | 3                | 5                |
| <b>70</b>   | 7           | 2             | 2                | 5                |
| <b>84</b>   | 7           | 2             | 2                | 5                |
